# Supplementary material for: Morphology-controlled porous carbons with dispersed Cu catalysts for efficient electrocatalytic nitrate reduction to ammonia
Source: Royal Society of Chemistry journal article supplement (doi:10.1039/d5cc06036b), 2026-01-01
Supplement: d5cc06036b1.pdf [file d5cc06036b1.pdf]

## Supporting Information

### Topology-Controlled Porous Carbons with Dispersed Cu Catalysts for Efficient Electrocatalytic Nitrate Reduction to Ammonia

Rui Qiao,<sup>a</sup> Manling Zhang,<sup>a</sup> Hongyin Hu,<sup>a</sup> Donghua Li,<sup>a</sup> Mingliang Du,<sup>a,b</sup> and Shuanglong Lu<sup>a\*</sup>

<sup>a</sup>Key Laboratory of Synthetic and Biological Colloids, Ministry of Education, School of Chemical and Material Engineering, Jiangnan University, Wuxi, Jiangsu 214122, P. R. China.  
E-mail: lushuanglong@jiangnan.edu.cn

<sup>b</sup>Zhejiang Provincial Innovation Center of Advanced Textile Technology, Shaoxing 312000, China

#### Contents

1. Experimental section
  2. Supporting Figures and table  
Figures S1 to S23 and Table S1
- References

## 1. Experimental section

**Reagents.** Hexakis (benzylthio) benzene (98%) was purchased from Xiangrui Technology Co., Ltd. (Nanjing, China). Thiophene (Guaranteed Reagent (GR)), chloroform (Analytical Reagent (AR)), ferric chloride ( $\text{FeCl}_3$ , anhydrous, AR), methanol (anhydrous, AR), ethanol (anhydrous, AR), cyclohexane (AR), potassium nitrate ( $\text{KNO}_3$ , AR), and  $\text{Cu}(\text{OAc})_2 \cdot \text{H}_2\text{O}$  (AR) were procured from Sinopharm Chemical Reagent Co., Ltd. (Shanghai, China). Potassium hydroxide (AR) was sourced from Titan Technology Co., Ltd. (Shanghai, China). Argon gas (Ar, 99.999%), nitrogen gas ( $\text{N}_2$ , 99.999%) and ammonia gas ( $\text{NH}_3$ , 99.999%) were obtained from Xinxiyi Technology Co., Ltd. (Wuxi, China). Nafion 117 membrane was obtained from Dupont Co., Ltd. (USA). Deionized water (resistivity: ca.18.42  $\text{M}\Omega \text{ cm}$ ) was used to prepare the electrolyte solutions. All reagents and solvents used in experiments were commercially available and were used without further purification.

**Synthesis of NT and NS.** 0.10 g of Hexakis (benzylthio) benzene and 10  $\mu\text{L}$  of thiophene were added to a 150 ml flask. 50 mL of chloroform was added to dissolve the mixture, and  $\text{N}_2$  was bubbled through as a protective atmosphere. The mixture was stirred at 25  $^\circ\text{C}$  for 30 minutes. Then, 0.57 g (3.5 mmol) of  $\text{FeCl}_3$  was added, and the mixture was stirred under  $\text{N}_2$  atmosphere for 0.5 hours to pre-polymerize. The mixture was then filtered to remove solid impurities, and the filtrate was transferred to a Teflon-lined autoclave. The autoclave was heated in an oven at 150  $^\circ\text{C}$  for 48 h. After cooling, the precipitate was collected by filtration. The solid was then purified by Soxhlet extraction with methanol for 72 h. Nanosheets (NS) were synthesized using the same procedure as NT, with the only difference being that the amount of chloroform used was reduced to 10 mL.

**Synthesis of Cu@NT and Cu@NS.**  $\text{Cu}(\text{OAc})_2 \cdot \text{H}_2\text{O}$  dissolved in ethanol to obtain a  $\text{Cu}^{2+}$  concentration of 1 mg  $\text{ml}^{-1}$  solution. 15 mg of NT was dispersed in 15 ml of ethanol, and then 100  $\mu\text{L}$  of  $\text{Cu}^{2+}$  solution was added. Stirred at 25  $^\circ\text{C}$  under nitrogen protection for 24 h. After centrifugation, further addition of cyclohexane was freeze-dried overnight to obtain Cu@NT. Cu@NS and Cu@NT coordinate metal in exactly the same way.

**Synthesis of NT-Cu, NT-Cu-NH<sub>3</sub> and NS-Cu-NH<sub>3</sub>.** Cu@NT was placed into a tube furnace, heating under Ar atmosphere at a rate of 2.5  $^\circ\text{C min}^{-1}$  to 1000  $^\circ\text{C}$  and maintain at this temperature for 3 h to obtain black powder, designated as NT-Cu. For comparison, heat Cu@NT first under Ar atmosphere for 2.5 h, followed by heating under a mixed atmosphere of Ar and  $\text{NH}_3$  (volume ratio = 15:1) for 0.5 h to obtain NT-Cu-NH<sub>3</sub>. Simultaneously, using Cu@NS as a precursor, NS-Cu-NH<sub>3</sub> was prepared under the same conditions.

**Materials Characterization.** The morphology and size of the samples were characterized using field-emission scanning electron microscopy (FE-SEM, Hitachi, Japan, S-4800) and transmission electron microscopy (TEM, JEOL, Japan, JEM-2100PLUS) at accelerating

voltages of 3 kV and 200 kV, respectively. X-ray photoelectron spectroscopy (XPS) was conducted on a Kratos Axis Supra spectrometer (Kratos, UK). X-ray diffraction (XRD) measurements were performed on a D8 Advance X-ray diffractometer (Bruker, Germany) using monochromatic Cu K $\alpha$  radiation. Fourier transform infrared spectroscopy (FT-IR) was conducted using a Nicolet iS5 FTIR spectrometer (TMO, US). Morphological and elemental analyses were performed with a field-emission scanning transmission electron microscope (STEM, TMO, US, Talos F200X G2).

### **Electrochemical Measurements.**

A total of 3 mg of the material was weighed and placed into a 2 mL sample vial, to which 970  $\mu$ L of isopropanol and 30  $\mu$ L of 5 wt% Nafion 117 solution were added. The mixture was ultrasonically dispersed for 30 minutes, resulting in a homogeneous catalyst ink. Subsequently, 50  $\mu$ L of the catalyst ink was loaded onto a 1  $\times$  1 cm<sup>2</sup> hydrophobic carbon paper and air-dried, resulting in a catalyst loading of 0.15 mg cm<sup>-2</sup>.

All electrochemical measurements were performed using a conventional three-electrode system on an AUTOLAB PGSTAT302N electrochemical workstation. The working electrode was prepared using the catalyst-coated carbon paper, while a carbon rod was employed as the counter electrode, and a saturated calomel electrode (Hg/Hg<sub>2</sub>Cl<sub>2</sub>, SCE) was used as the reference electrode. Electrochemical nitrate reduction reaction (NO<sub>3</sub>RR) tests were conducted in a two-compartment H-cell separated by a Nafion 117 proton exchange membrane, using 0.1 M KOH and 0.5 M KNO<sub>3</sub> as the electrolyte solutions. The tests included cyclic voltammetry (CV), linear sweep voltammetry (LSV), and chronoamperometry (i-t). All potentials mentioned in this study were converted to the reversible hydrogen electrode (RHE) scale using the equation:

$$E_{\text{RHE}} = E_{\text{SCE}} + 0.0591 \times \text{pH} + 0.197$$

Constant potential tests were conducted at intervals of -0.1 V within a potential range of -0.59 to -1.09 V vs. RHE, with each potential held for 1 hour under stirring at 400 rpm. Isotopic labeling experiments were performed at -0.99 V vs. RHE under identical conditions, except that the nitrogen source was replaced with 99% K<sup>15</sup>NO<sub>3</sub>.

The electrochemical surface area (ECSA) was determined by measuring CV curves at different scan rates within a non-Faradaic potential range. A plot of the non-Faradaic current density ( $\Delta j = 0.5 \times |j_{\text{charge}} - j_{\text{discharge}}|$ ) against the scan rate produced a linear relationship, with the slope corresponding to the electrochemical double-layer capacitance ( $C_{\text{dl}}$ ). The ECSA was calculated by dividing  $C_{\text{dl}}$  by the specific capacitance ( $C_{\text{s}}$ ) of the sample.

### **Product concentration determination.**

Ultraviolet-visible spectroscopy (UV-Vis) was employed for the quantitative detection of electrocatalytic products. The post-electrolysis electrolyte was diluted to an appropriate

concentration to fall within the range of the standard calibration curve, and a chromogenic agent was used for color development. The concentration of the products was then calculated based on the corresponding standard curve.

For the detection of  $\text{NO}_2^-$ , a chromogenic reagent consisting of p-aminobenzenesulfonamide (4 g), N-(1-naphthyl) ethylenediamine dihydrochloride (0.2 g), ultrapure water (50 mL), and phosphoric acid (10 mL,  $\rho=1.70$  g/mL) was used. A specific volume of the electrolyte was extracted from the electrolysis cell and diluted to 2 mL to match the detection range of the standard curve. Subsequently, 40 L of the chromogenic reagent was added to the 2 mL solution and mixed thoroughly. The concentration of  $\text{NO}_2^-$  in the electrolyte after testing was calculated using the absorbance at 525 nm and the standard calibration curve.

For the quantification of  $\text{NH}_3$ , the salicylate method was employed, wherein  $\text{NH}_3$  reacts with salicylate and hypochlorite to form indophenol blue. The chromogenic reagents consisted of sodium hypochlorite solution (0.05 M, ~4.5% active chlorine), sodium nitroprusside solution (1 wt%), and a salicylate-citrate-NaOH mixture (prepared by dissolving 5 g of salicylic acid and 5 g of sodium citrate in 100 mL of 1 M NaOH solution). A specific volume of the electrolyte was extracted from the electrolysis cell and diluted to 2 mL. Subsequently, 400  $\mu\text{L}$  of the salicylate-citrate-NaOH mixture, 200  $\mu\text{L}$  of the sodium hypochlorite solution, and 200  $\mu\text{L}$  of the sodium nitroprusside solution were sequentially added and mixed thoroughly. The solution was left to stand for 2 hours before UV-Vis measurement. The concentration of  $\text{NH}_3$  in the electrolyte after testing was determined based on the absorbance at 658 nm and the corresponding standard calibration curve.

#### **Calculation of Faradaic Efficiency (FE).**

The Faradaic efficiency (FE) for the formation of each product was calculated according to the following equation:

$$\text{FE} = \frac{n \cdot F \cdot C \cdot V}{Q} \times 100\%$$

where  $n$  is the number of electrons transferred per molecule of product formed. According to the electrochemical reaction pathways,  $n$  equals 8 for the reduction of  $\text{NO}_3^-$  to  $\text{NH}_3$ , 2 for the reduction of  $\text{NO}_3^-$  to  $\text{NO}_2^-$ , and 2 for the hydrogen evolution reaction (HER,  $\text{H}^+ \rightarrow \text{H}_2$ ).  $F$  is the Faraday constant ( $96485 \text{ C mol}^{-1}$ ).  $C$  ( $\text{mol L}^{-1}$ ) is the concentration of the target product in the electrolyte, quantified by UV-vis spectroscopy (for  $\text{NH}_3$  and  $\text{NO}_2^-$ ) or gas chromatography (for  $\text{H}_2$ ).  $V$  is the electrolyte volume, fixed at 0.05 L in this work.  $Q$  (C) is the total charge passed during the chronoamperometric test under a constant applied potential.

#### **Calculation of $\text{NH}_3$ Yield Rate.**

The  $\text{NH}_3$  yield rate was calculated using the following equation:

$$\text{Yield Rate} = \frac{C \cdot V}{m \cdot t}$$

where  $C$  ( $\text{mol L}^{-1}$ ) is the experimentally determined  $\text{NH}_3$  concentration obtained from UV-vis calibration,  $V$  is the electrolyte volume (0.05 L),  $m$  is the catalyst loading on the working electrode ( $1.5 \times 10^{-4}$  g), and  $t$  is the electrolysis time, fixed at 1 h in this study. The calculated yield rate is expressed in units of  $\text{mol g}^{-1}_{\text{catalyst}} \text{h}^{-1}$ .

As an example, for NT-Cu- $\text{NH}_3$  at  $-0.99$  V vs. RHE, the chronoamperometric test was conducted for 1 h. After electrolysis, the electrolyte was diluted by a factor of 80, and the  $\text{NH}_3$  concentration determined by the indigo carmine method was  $149.138 \mu\text{mol L}^{-1}$ . The actual  $\text{NH}_3$  concentration in the electrolyte was therefore calculated to be  $0.01193 \text{ mol L}^{-1}$ . Substituting these values into the above equation gives:

$$\text{Yield Rate} = \frac{0.01193 \times 0.05}{1.5 \times 10^{-4} \times 1} = 3.98 \text{ mol g}^{-1} \text{ h}^{-1}$$

which agrees well with the reported average  $\text{NH}_3$  yield of approximately  $4.05 \text{ mol g}^{-1} \text{ h}^{-1}$ .

During the corresponding electrolysis, the catalyst exhibited an average current density of approximately  $143.4 \text{ mA cm}^{-2}$  (absolute value) over a geometric electrode area of  $1 \text{ cm}^2$ . This value was obtained by averaging the steady-state current density in the time window from 600 to 3600 s during the chronoamperometric test, thereby excluding the initial transient current response. The total charge passed ( $Q$ ) was determined by integrating the steady-state current over the entire 1 h electrolysis period, yielding a value of 524.34 C.

## 2. Supporting Figures and Table

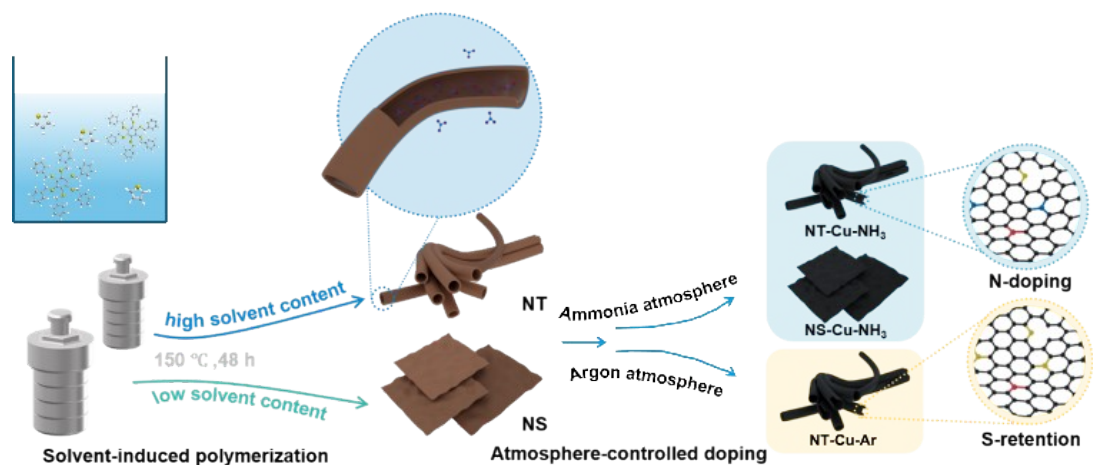

**Fig. S1.** Schematic diagram of NT-Cu-NH<sub>3</sub>, NS-Cu-NH<sub>3</sub> and NT-Cu-Ar synthesis.

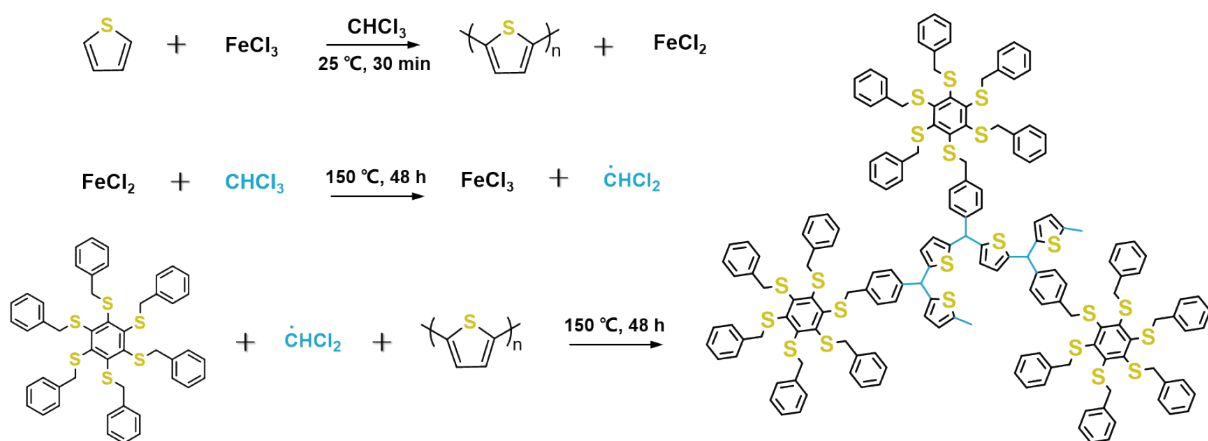

**Fig. S2.** Reaction mechanism of solvent-induced polymerization strategy.

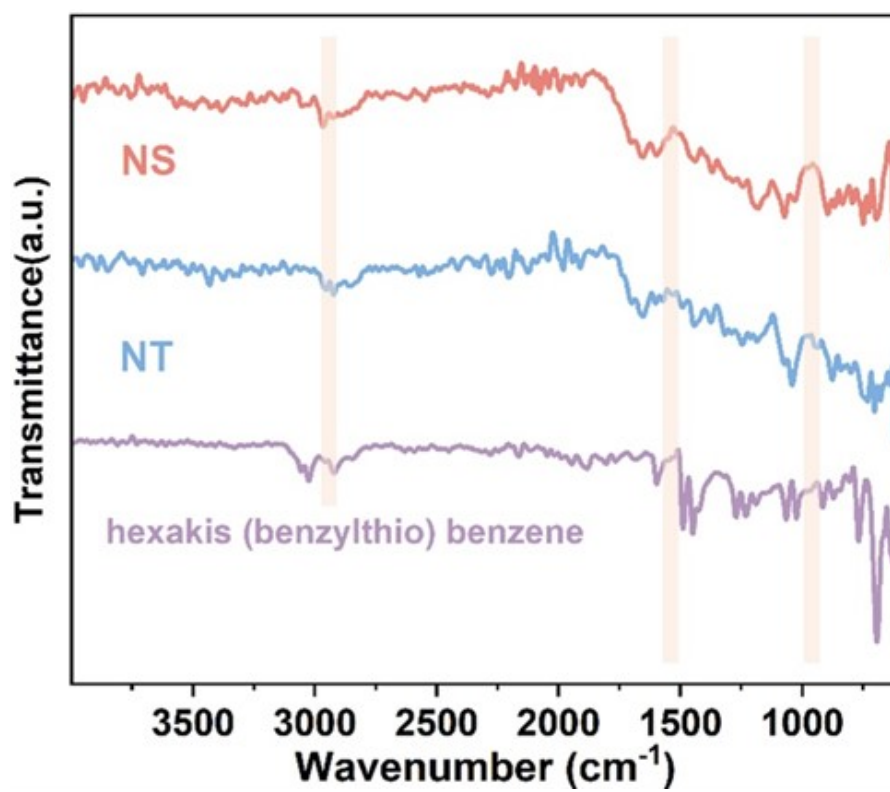

**Fig. S3.** FT-IR spectra of NT, NS and hexakis(benzylthio)benzene.

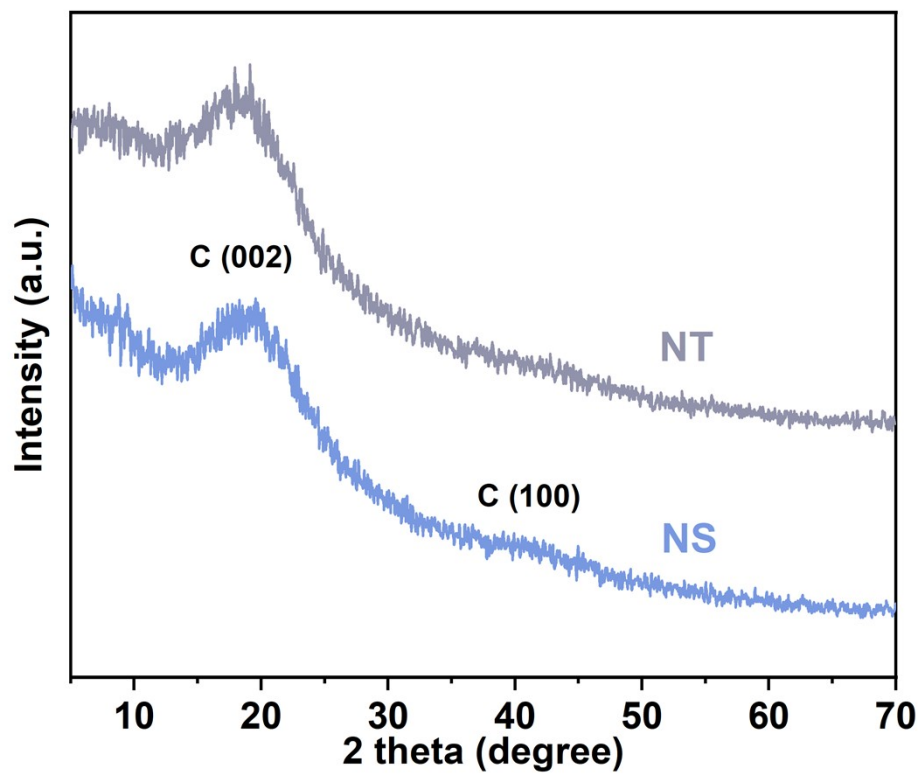

**Fig. S4.** XRD patterns of NT and NS.

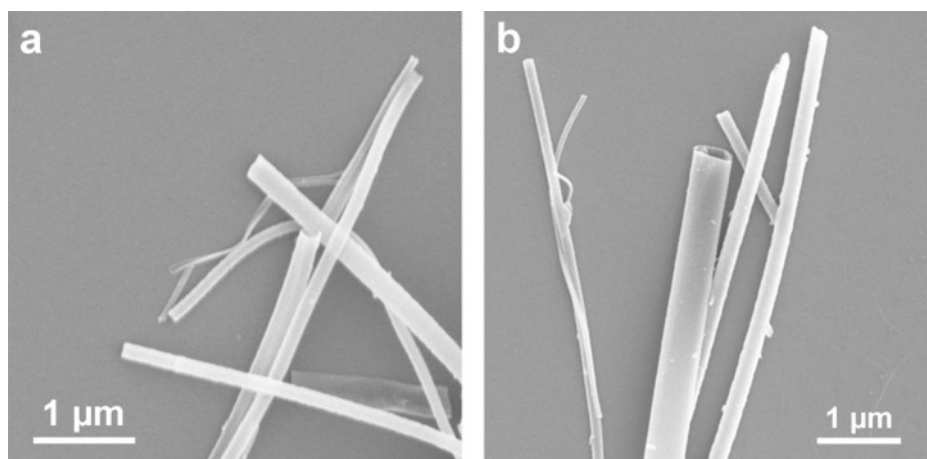

**Fig. S5.** SEM images of NT-Cu-Ar.

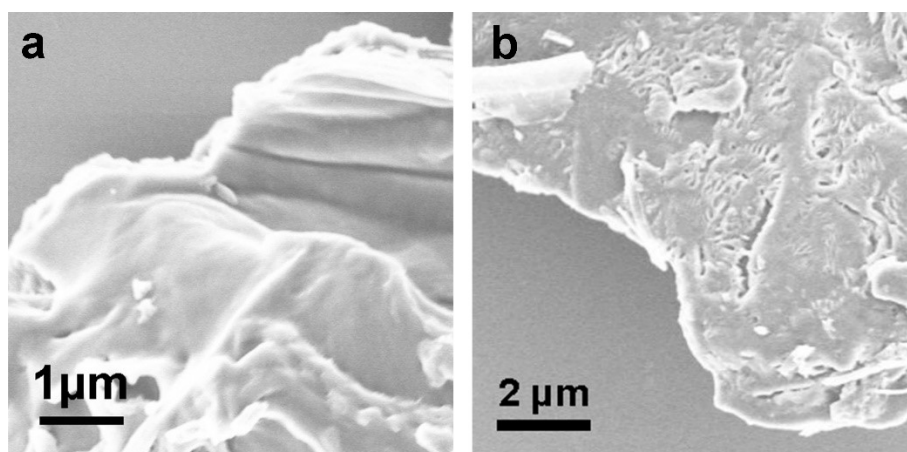

**Fig. S6.** SEM images of NS-Cu-NH<sub>3</sub>.

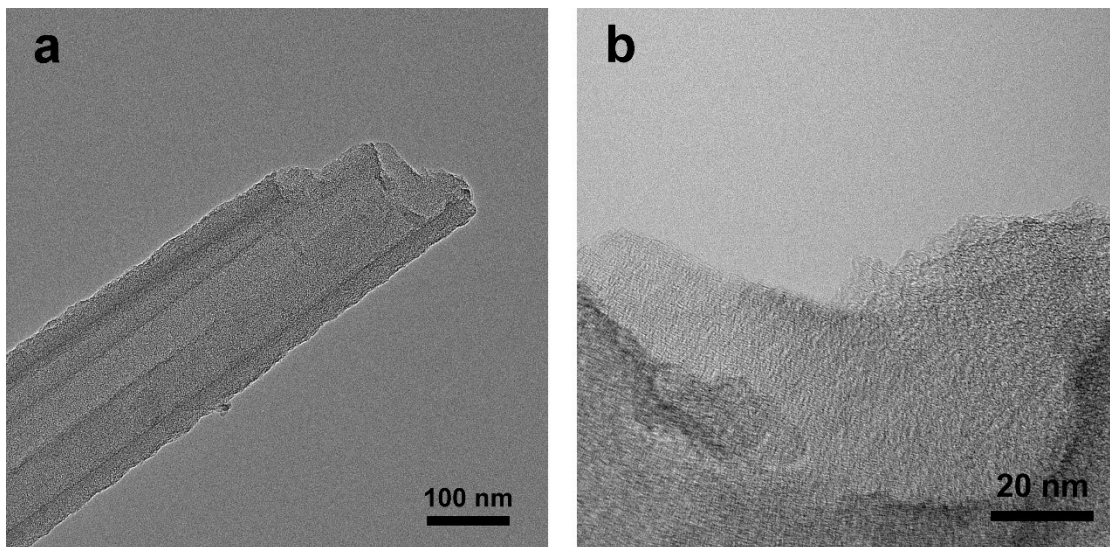

**Fig. S7.** TEM image of NT-Cu-Ar.

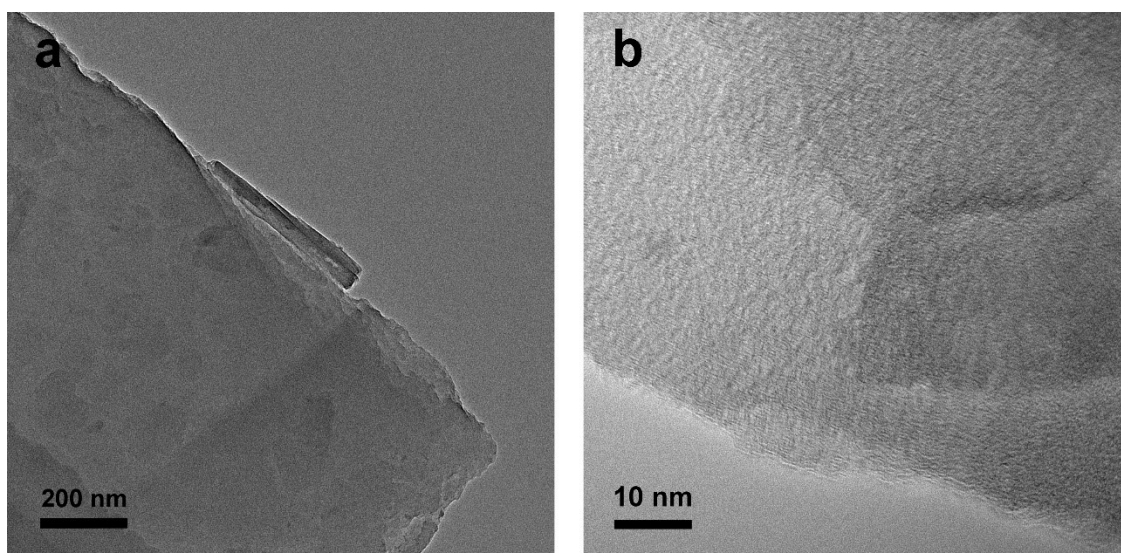

**Fig. S8.** TEM image of NS-Cu-NH<sub>3</sub>.

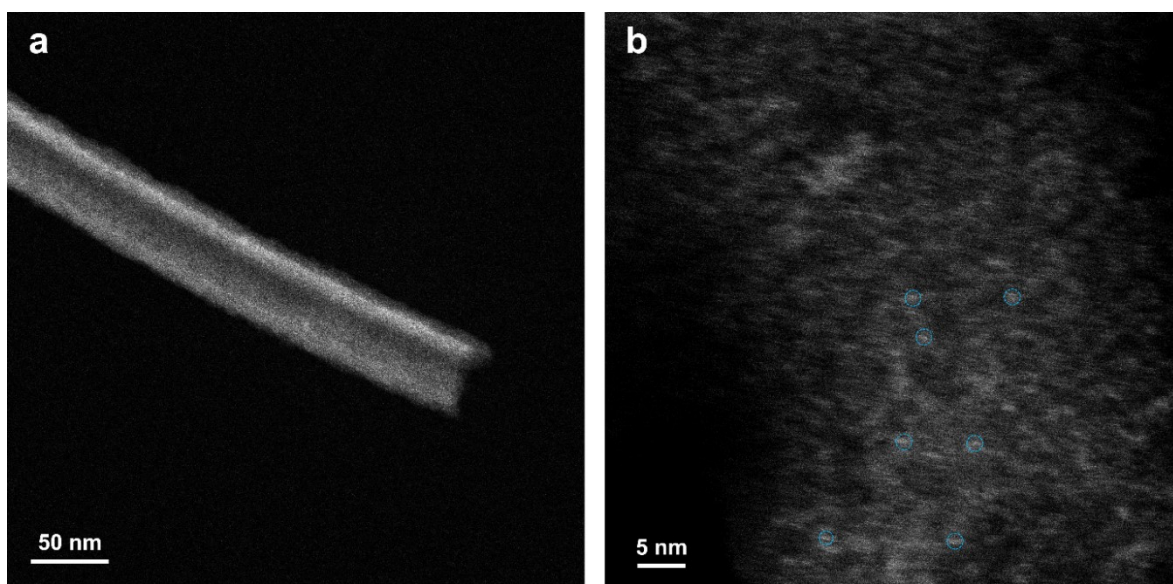

**Fig. S9.** Aberration-corrected HAADF-STEM image of NT-Cu-NH<sub>3</sub>.

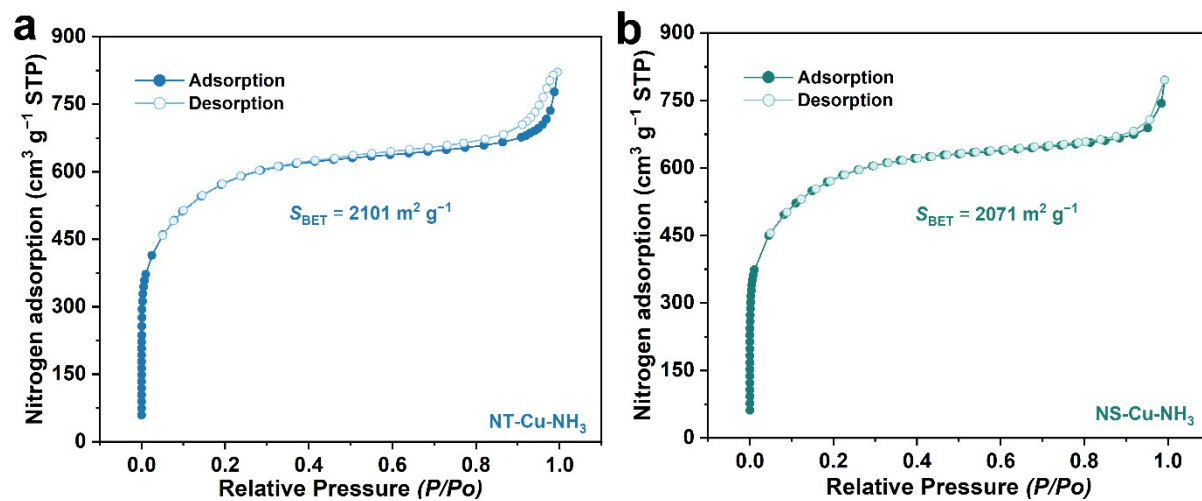

Fig. S10. N<sub>2</sub> sorption isotherms of (a) NT-Cu-NH<sub>3</sub> and (b) NS-Cu-NH<sub>3</sub>.

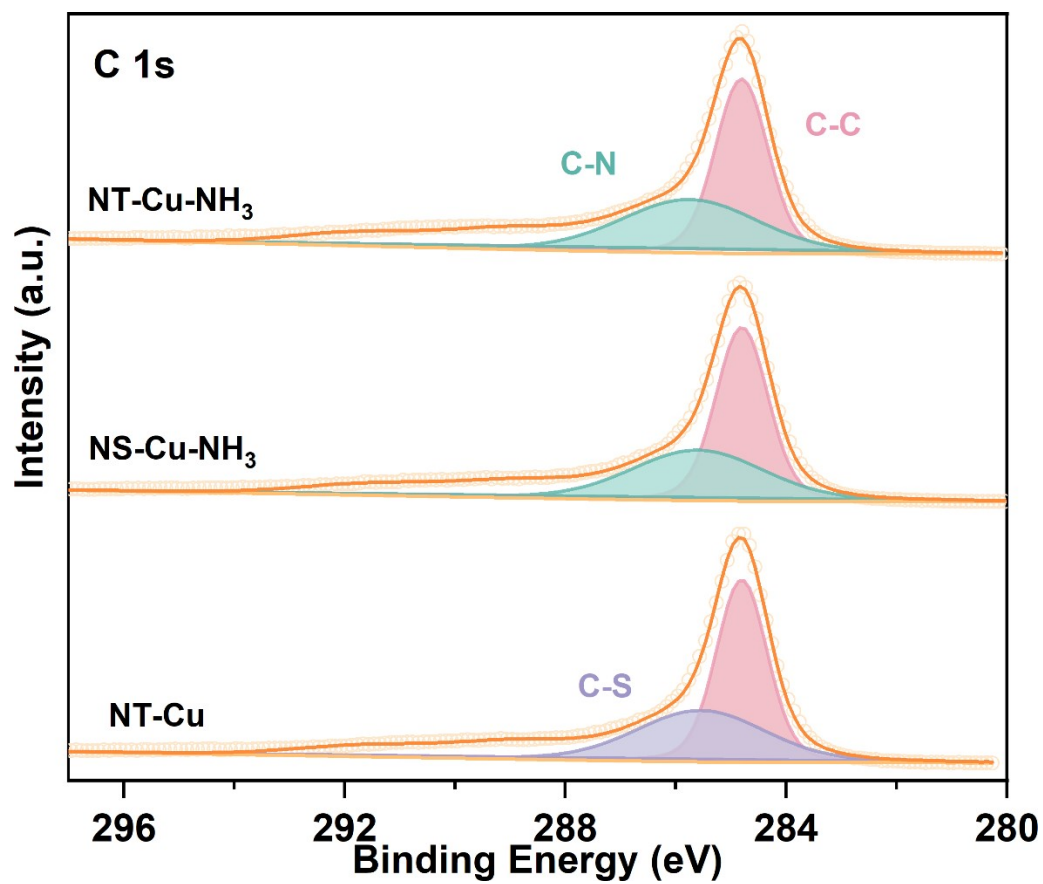

Fig. S11. High-resolution C1s XPS spectra of NT-Cu-NH<sub>3</sub>, NS-Cu-NH<sub>3</sub> and NT-Cu-Ar.

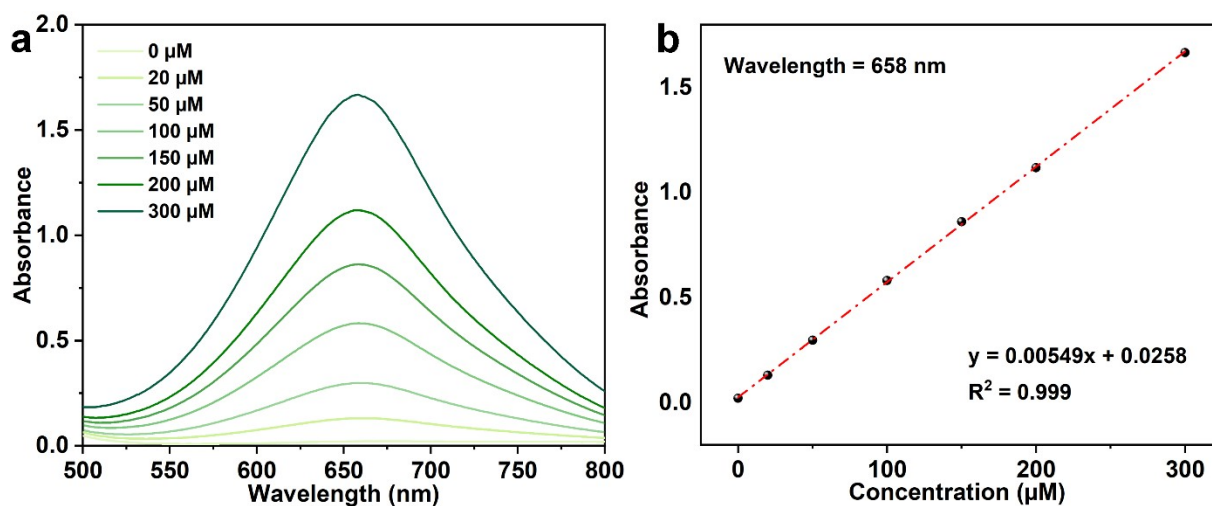

**Fig. S12.** The (a)UV-Vis curves and (b)calibration curves of the electrolyte with the given  $\text{NH}_3$  concentrations.

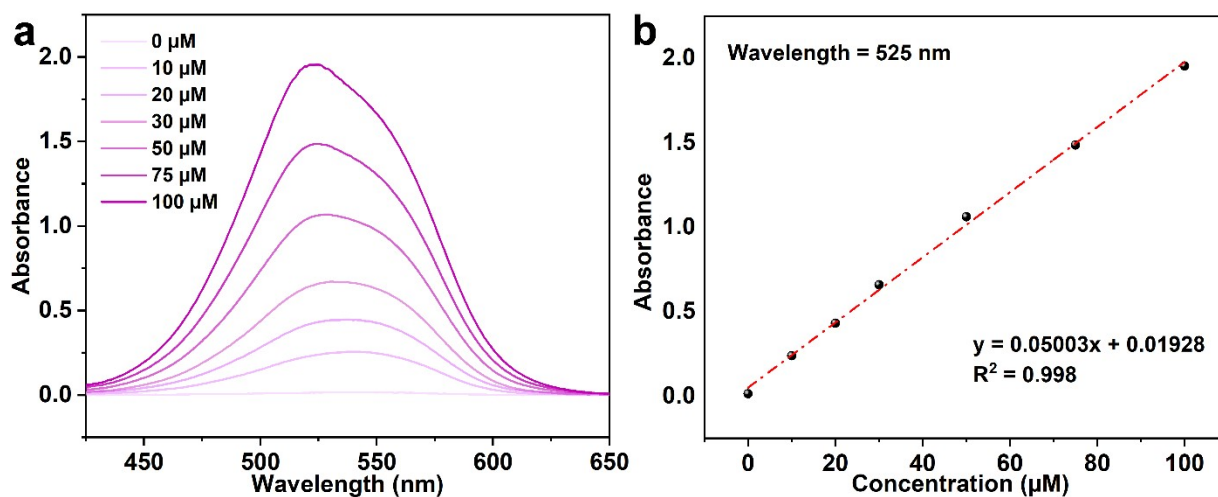

**Fig. S13.** The (a)UV-Vis curves and (b)calibration curves of the electrolyte with the given  $\text{NO}_2^-$  concentrations.

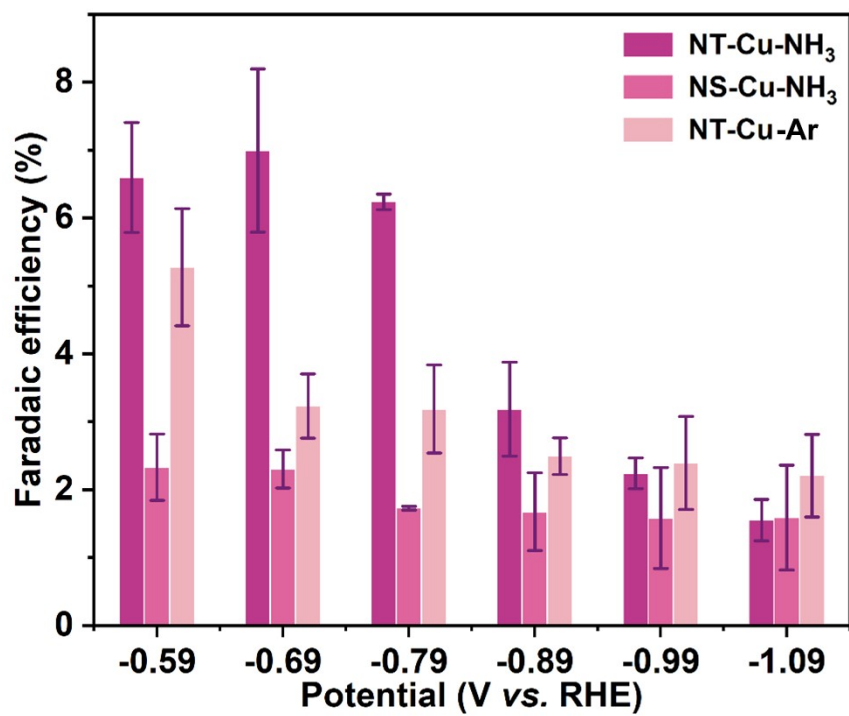

Fig. S14. NO<sub>2</sub><sup>-</sup> FE of NT-Cu-NH<sub>3</sub>, NS-Cu-NH<sub>3</sub> and NT-Cu-Ar at each given potential.

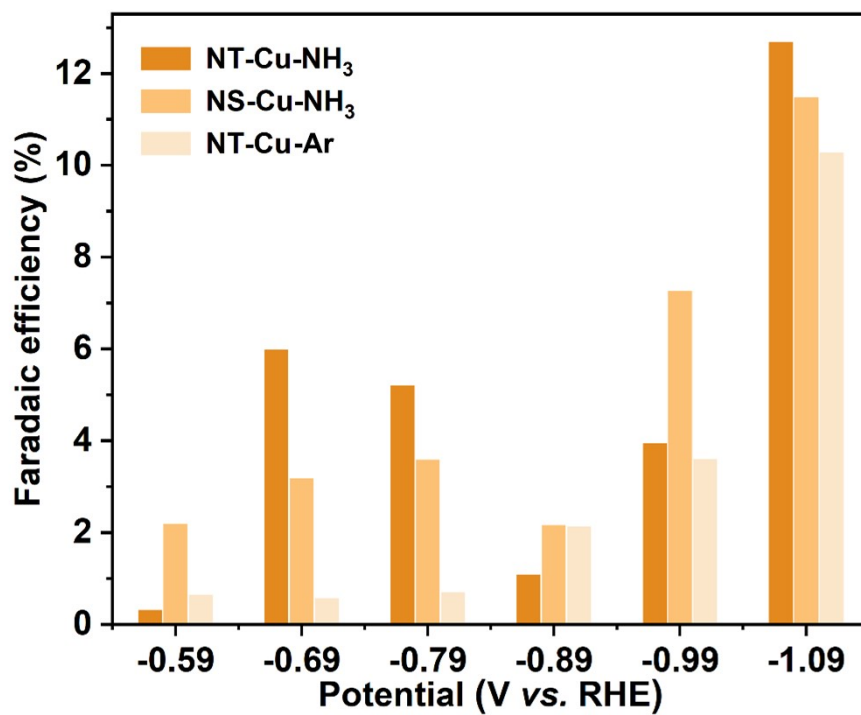

**Fig. S15.** H<sub>2</sub> FE of NT-Cu-NH<sub>3</sub>, NS-Cu-NH<sub>3</sub> and NT-Cu-Ar at each given potential.

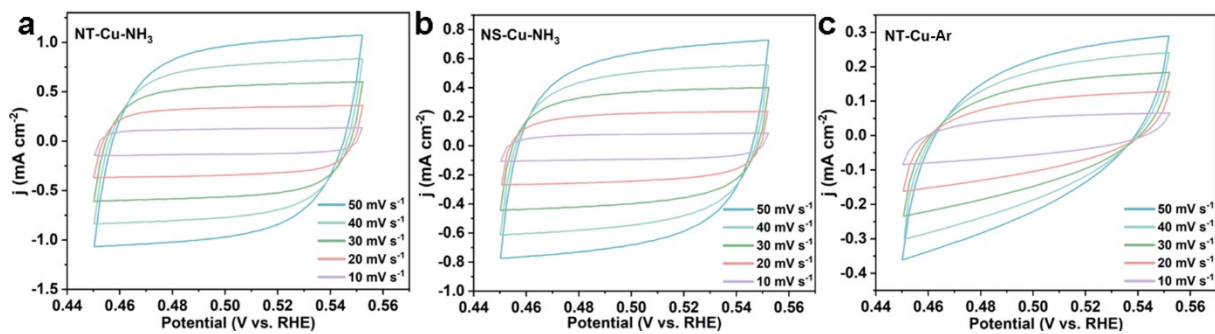

**Fig. S16.** CV with different scan rate for (a)NT-Cu-NH<sub>3</sub>, (b)NS-Cu-NH<sub>3</sub> and (c)NT-Cu-Ar.

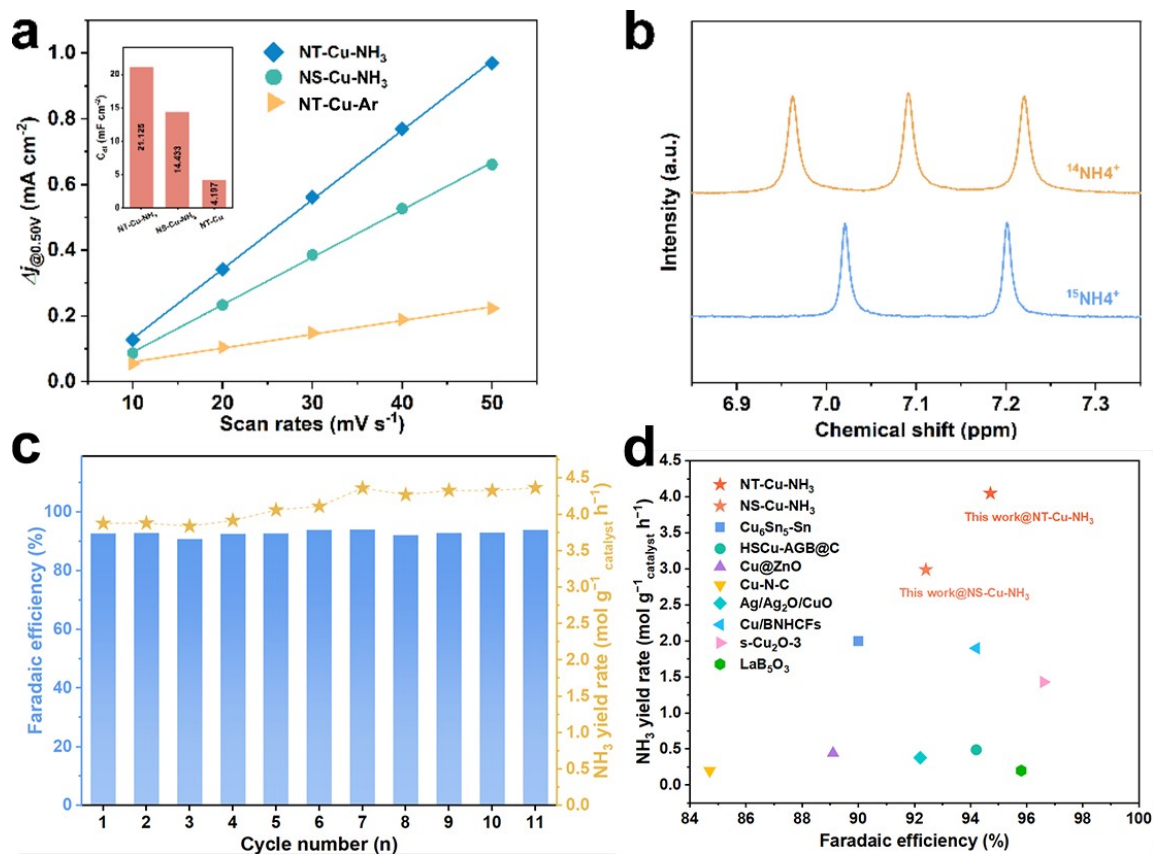

**Fig. S17.** (a) Double-layer capacitances of NT-Cu-NH<sub>3</sub>, NS-Cu-NH<sub>3</sub>, and NT Cu-Ar; (b) <sup>1</sup>H NMR spectrum of the electrolyte after testing NT-Cu-NH<sub>3</sub> at -0.99 V vs. RHE; (c) Cycling tests of NT-Cu-NH<sub>3</sub> for nitrate reduction at -0.99 V vs. RHE; (d) Comparison of NH<sub>3</sub> yield rate and FE between NT-Cu-NH<sub>3</sub>, NS Cu-NH<sub>3</sub>, and other Cu-based electrocatalysts for NO<sub>3</sub>RR.

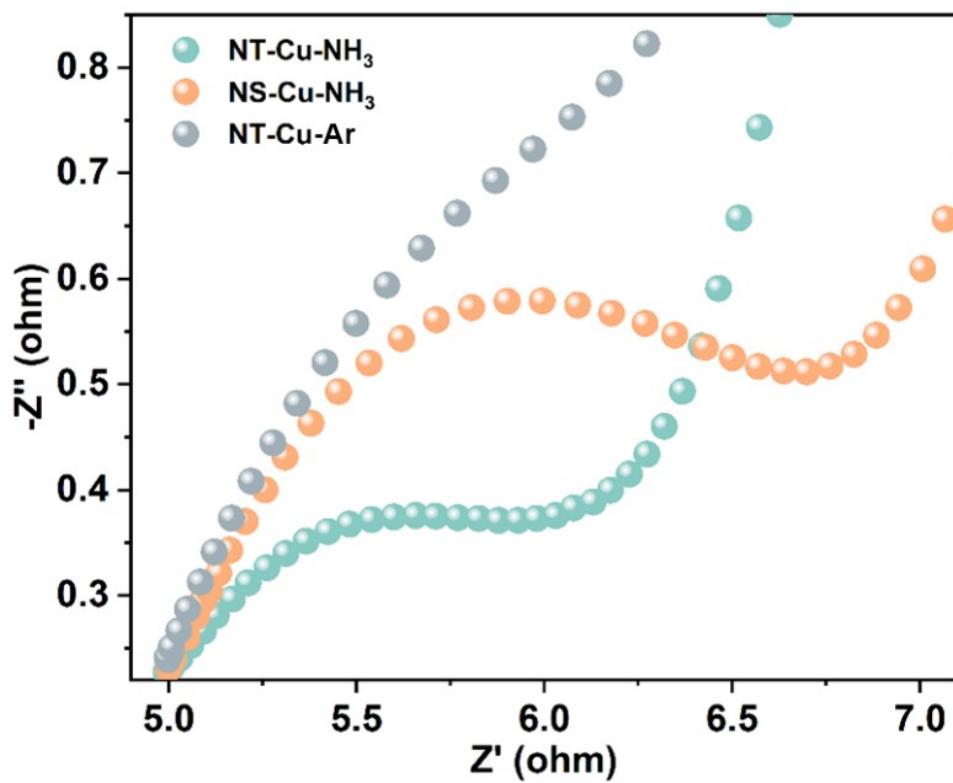

Fig. S18. EIS image of NT-Cu-NH<sub>3</sub>, NS-Cu-NH<sub>3</sub> and NT-Cu-Ar.

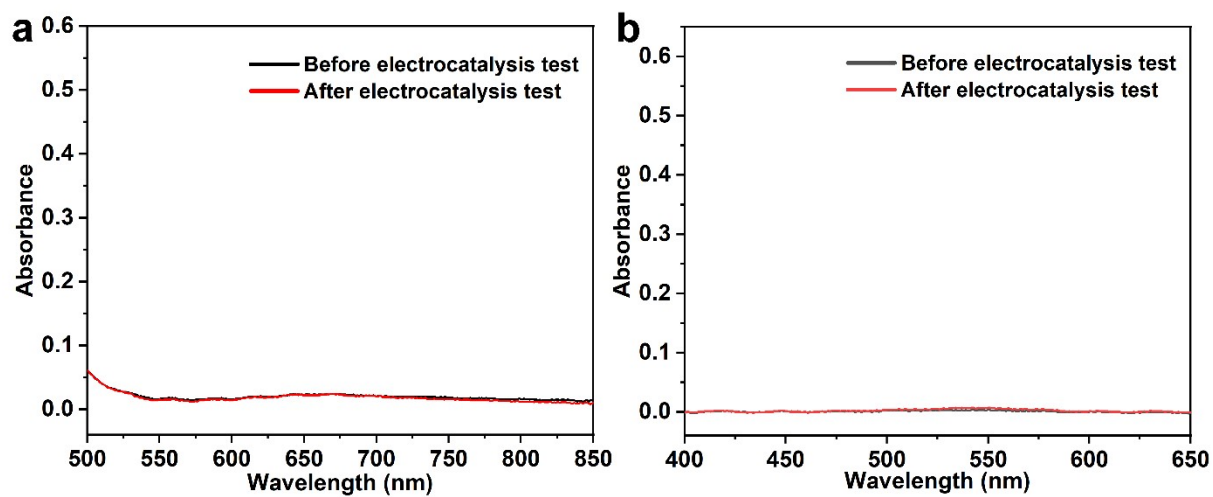

**Fig. S19.** UV-Vis curves of electrolytes before and after electrocatalysis test for NT-Cu-NH<sub>3</sub> in a KOH solution without KNO<sub>3</sub>. (a) UV-vis curves for NH<sub>3</sub>; (b) UV-vis curves for NO<sub>2</sub><sup>-</sup>.

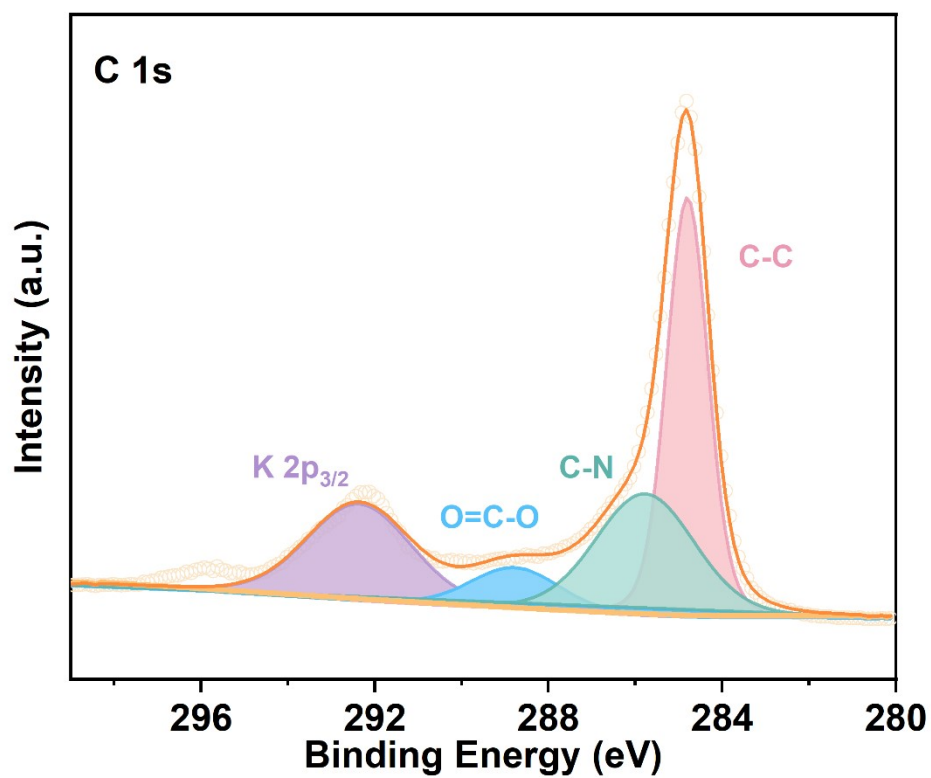

Fig. S20 High-resolution C1s XPS spectra of NT-Cu-NH<sub>3</sub> after test.

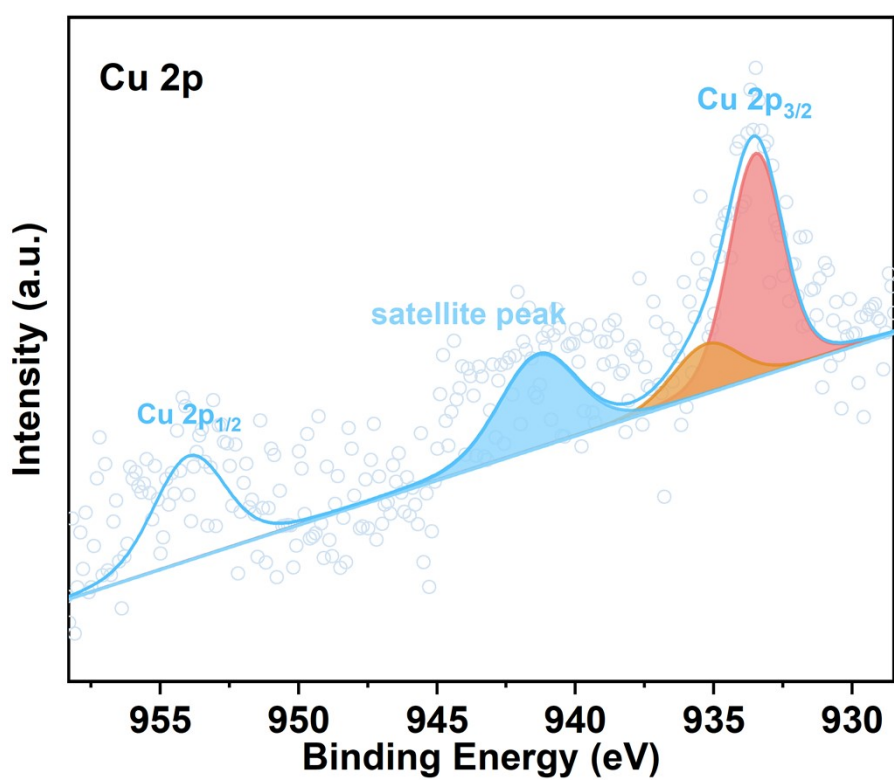

Fig. S21. High-resolution Cu2p XPS spectra of NT-Cu-NH<sub>3</sub> after test.

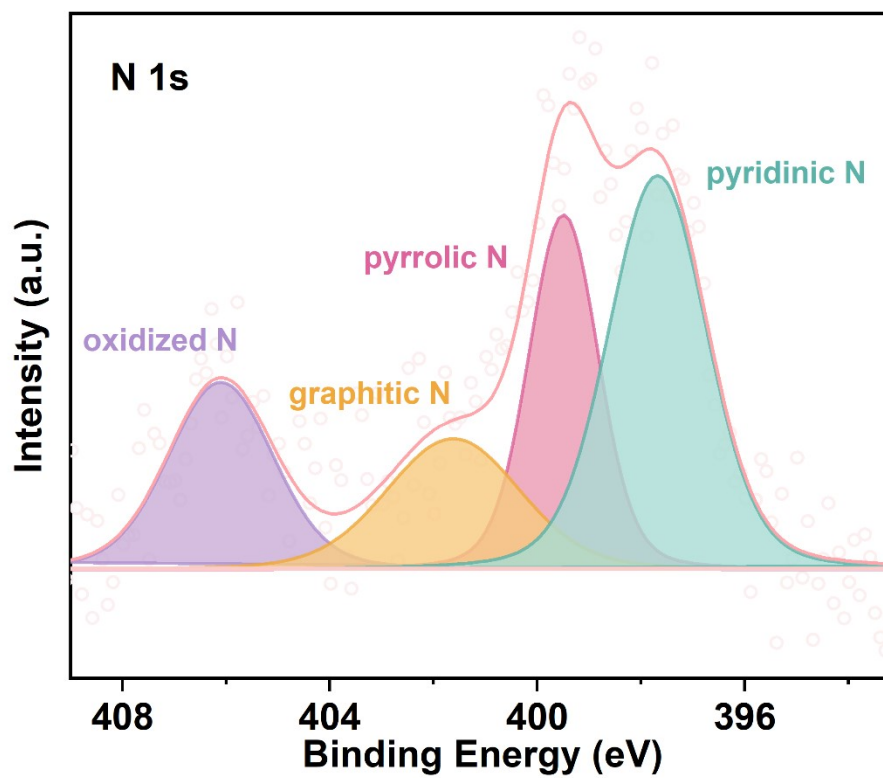

**Fig. S22.** High-resolution N1s XPS spectra of NT-Cu-NH<sub>3</sub> after test.

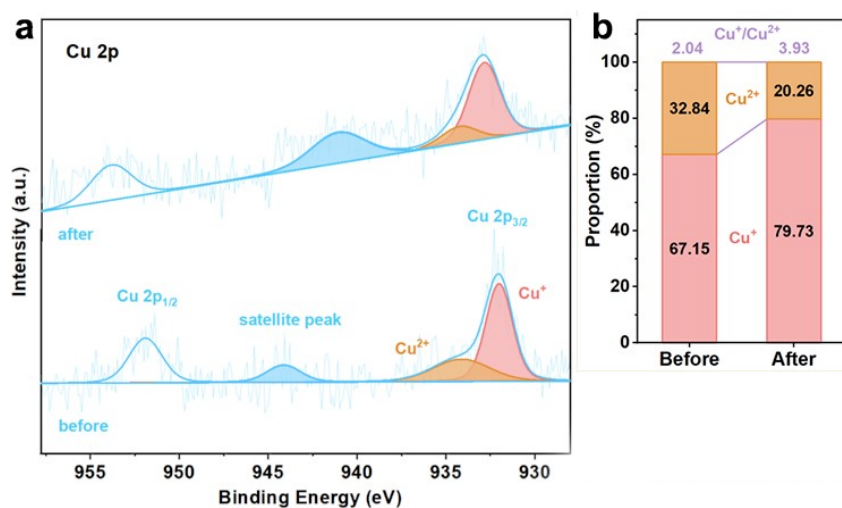

**Fig. S23.** (a) High-resolution Cu 2p XPS spectra of NT-Cu-NH<sub>3</sub> before and after test. (b) Comparison of Cu valence state distribution derived from XPS peak deconvolution before and after electrochemical cycling, highlighting the increased proportion of Cu<sup>+</sup> species after long-term NO<sub>3</sub>RR operation.

**Table S1.** Summary of recently reported NH<sub>3</sub> yield rate and Faraday efficiencies for copper-doped catalyst performance.

| electrocatalyst                         | NH <sub>3</sub> yield rate<br>(mol g <sup>-1</sup> h <sup>-1</sup> ) | NH <sub>3</sub> yield rate<br>(mol cm <sup>-2</sup> h <sup>-1</sup> ) | Faraday<br>efficiency (%) | Electrolyte                                      | Catalyst<br>loading (g) | testing<br>time (h) | Ref.      |
|-----------------------------------------|----------------------------------------------------------------------|-----------------------------------------------------------------------|---------------------------|--------------------------------------------------|-------------------------|---------------------|-----------|
| NT-Cu-NH <sub>3</sub>                   | 4.05                                                                 | 6.08×10 <sup>-4</sup>                                                 | 94.7                      | 0.1 M KOH                                        | 1.5×10 <sup>-4</sup>    | 1.0                 | This work |
| NS-Cu-NH <sub>3</sub>                   | 2.99                                                                 | 4.49×10 <sup>-4</sup>                                                 | 92.4                      | (0.5 M KNO <sub>3</sub> )                        | 1.5×10 <sup>-4</sup>    | 1.0                 | This work |
| Cu <sub>6</sub> Sn <sub>5</sub> -Sn NPs | 2.00                                                                 | 2.00×10 <sup>-4</sup>                                                 | 90.0                      | 0.1 M KOH<br>(0.1 M KNO <sub>3</sub> )           | 1×10 <sup>-4</sup>      | 2.0                 | 1         |
| HSCu-AGB@C                              | 0.49                                                                 | 9.76×10 <sup>-4</sup>                                                 | 94.2                      | 1 M KOH<br>(0.1 M KNO <sub>3</sub> )             | 5×10 <sup>-4</sup>      | 1.0                 | 2         |
| CuCo-TPA-E                              | –                                                                    | 1.12×10 <sup>-3</sup>                                                 | 99.6                      | 1 M KOH<br>(0.1 M KNO <sub>3</sub> )             | –                       | 0.5                 | 3         |
| NiBDC@HsGDY@Cu                          | –                                                                    | 3.20×10 <sup>-4</sup>                                                 | 99.2                      | 1 M KOH<br>(0.1 M NO <sub>3</sub> <sup>-</sup> ) | –                       | 1.0                 | 4         |
| Cu <sub>50</sub> Ni <sub>50</sub>       | –                                                                    | 5.84×10 <sup>-4</sup>                                                 | 89.6                      | 1 M KOH<br>(0.1 M KNO <sub>3</sub> )             | –                       | 2.0                 | 5         |
| Cu@ZnO NWA                              | 0.44                                                                 | 3.55×10 <sup>-4</sup>                                                 | 89.1                      | 0.1 M KOH<br>(0.1 M KNO <sub>3</sub> )           | 8×10 <sup>-4</sup>      | 2.0                 | 6         |
| Cu-N-C SAC                              | 0.20                                                                 | 2.65×10 <sup>-4</sup>                                                 | 84.7                      | 0.1 M KOH<br>(0.1 M KNO <sub>3</sub> )           | 8×10 <sup>-3</sup>      | 0.5                 | 7         |
| Cu <sub>30</sub> Co <sub>70</sub>       | –                                                                    | 3.02×10 <sup>-4</sup>                                                 | ~100                      | 1 M KOH<br>(0.1 M KNO <sub>3</sub> )             | –                       | 1.0                 | 8         |
| Ag/Ag <sub>2</sub> O/CuO                | 0.38                                                                 | 3.76×10 <sup>-4</sup>                                                 | 92.2                      | 1 M KOH<br>(0.1 M KNO <sub>3</sub> )             | 1×10 <sup>-3</sup>      | 1.0                 | 9         |
| Cu/BNHCFs                               | 1.90                                                                 | 4.75×10 <sup>-4</sup>                                                 | 94.2                      | 1 M KOH<br>(0.1 M KNO <sub>3</sub> )             | 2.5×10 <sup>-4</sup>    | 1.0                 | 10        |
| s-Cu <sub>2</sub> O-3                   | 1.43                                                                 | 2.85×10 <sup>-4</sup>                                                 | 96.6                      | 1 M KOH<br>(0.1 M KNO <sub>3</sub> )             | 5×10 <sup>-5</sup>      | 0.5                 | 11        |
| LaB <sub>5</sub> O <sub>3</sub>         | 0.20                                                                 | 2.97×10 <sup>-4</sup>                                                 | 95.8                      | 1 M KOH<br>(0.1 M KNO <sub>3</sub> )             | 1.45×10 <sup>-3</sup>   | 1.0                 | 12        |

## References

- 1 J. Yu, A. F. Kolln, D. Jing, J. Oh, H. Liu, Z. Qi, L. Zhou, W. Li, W. Huang, *ACS Appl. Mater. Interfaces*, 2021, 13, 52073-52081.
- 2 Q. Hu, Y. Qin, X. Wang, H. Zheng, K. Gao, H. Yang, P. Zhang, M. Shao, C. He, *CCS Chemistry*, 2022, 4, 2053-2064.
- 3 J. Yang, W. Zhang, H. Zhao, Y. Zou, Z. Zhang, J. Liu, J. Wang, Z. Gu, X. Yan, *Appl. Catal. B- Environ.*, 2024, 340, 123237.
- 4 B. Wang, J. Ma, R. Yang, B. Meng, X. Yang, Q. Zhang, B. Zhang, S. Zhuo, *Angew. Chem., Int. Ed.*, 2024, 63, e202404819.
- 5 Y. Bu, C. Wang, W. Zhang, X. Yang, J. Ding, G. Gao, *Angew. Chem., Int. Ed.*, 2023, 62, e202217337.
- 6 A. Feng, Y. Hu, X. Yang, H. Lin, Q. Wang, J. Xu, A. Liu, G. Wu, Q. Li, *ACS Catal.*, 2024, 14, 5911.
- 7 J. Yang, H. Qi, A. Li, X. Liu, X. Yang, S. Zhang, Q. Zhao, Q. Jiang, Y. Su, L. Zhang, J. Li, Z. Tian, W. Liu, A. Wang, T. Zhang, *J. Am. Chem. Soc.*, 2022, 144: 12062-12071.
- 8 A. Wu, Y. Zhou, J. Lv, D. Zhang, Y. Peng, Q. Ye, P. Fu, W. Wang, X. Lin, S. Liu, M. Xu, Z. Qi, S. Zhu, W. Zhu, J. Yan, X. Tu, X. Li, *ACS Sustainable Chem. Eng.*, 2022, 10, 14539-14548.
- 9 W. Go, R. A. Senthil, J. Cherusseri, A. Kumar, C. J. Moon, W. Limphirat, M. Ubaidullah, M. Y. Choi, *Adv. Funct. Mater.*, 2025, 35, e11876.
- 10 R. He, L. Sun, K. Ren, X. Li, P. Tian, J. Ye, *J. Mater. Chem. A*, 2026, 14, 394-402.
- 11 J. Li, K. Wu, J. Heng, L. Zhu, X. Wang, Q. Han, T. Qiang, *Small*, 2025, 21, 2411005.
- 12 L. Zhou, D. Feng, Z. Li, H. Li, C. Ge, X. Zhang, T. Ma, *Adv. Funct. Mater.*, 2025, e14375.
